# Supplementary material
Source: PubMed Central journal article supplement (PMC3811520)
Supplement: AEM.01664-13_zam999104878so1.pdf [file AEM.01664-13_zam999104878so1.pdf]

Supplemental table 1. Oligonucleotides used in this study

| Oligonucleotide | Sequence (5' to 3')                  | Purpose                                     | Reference  |
|-----------------|--------------------------------------|---------------------------------------------|------------|
| KAN-2 FP-1      | ACCTACAACAAAGCTCTCATCAACC            | Sequence analysis of all strains            | This study |
| KAN-2 RP-1      | GCAATGTAACATCAGAGATTTTGAG            | Sequence analysis of all strains            | This study |
| M13 R           | CGACGTTGTAACGACGGCCAGT               | Sequence analysis strain 330                | This study |
| 2d-RP3          | TGGAAGGTACCTGGATGGC                  | Sequence analysis strain 330                | This study |
| 3c-RP3          | TGGTCATCGCGCTCGGTG                   | Sequence analysis strain 330                | This study |
| 3c-RP4          | TCACCACCAGCGCACCGC                   | Sequence analysis strain 330                | This study |
| 6b-FP3          | ACCGGGGTGGTCAGCTCG                   | Sequence analysis strain 330                | This study |
| 6b-FP4          | TGCGTTACCGGGTGACCG                   | Sequence analysis strain 330                | This study |
| 4b-FP3          | GACGACTGGTCGTGCCCG                   | Sequence analysis strain 1510               | This study |
| 4b-FP4          | CCGTCACCGTTCTCGAGG                   | Sequence analysis strain 1510               | This study |
| 4c-RP3          | GATGCTCCAGTGCCTGGTG                  | Sequence analysis strain 1510               | This study |
| 4c-RP4          | TCCTGTCTCGCCACAGGG                   | Sequence analysis strain 1510               | This study |
| 1d-RP3          | GGCGAATTCGGCCAGTGC                   | Sequence analysis strain 1608               | This study |
| 1d-RP4          | GTCGGGCTGTTGTTCCC                    | Sequence analysis strain 1608               | This study |
| 16S rRNA 400F   | ACGAAGCTGAGTGACGGTA                  | Quantification of 16S rRNA                  | 1          |
| 16S rRNA 500RV  | ACTCAAGTCTGCCCGTATCG                 | Quantification of 16S rRNA                  | 1          |
| RT-tlsA-200F    | CCGACGGACAAGTCCAATGC                 | Quantification of <i>tlsA</i>               | This study |
| RT-tlsA-200RV   | CGACACCGTGTGCTCGATCG                 | Quantification of <i>tlsA</i>               | This study |
| RT-alkB-200F    | GCATGGCTGATGACCCTCG                  | Quantification of <i>alkB</i>               | This study |
| RT-alkB-200RV   | GCACAGGCGATCACTGTTCC                 | Quantification of <i>alkB</i>               | This study |
| RT-fda-200F     | CGAGAAGGGCAAGTACCTGC                 | Quantification of <i>fda</i>                | This study |
| RT-fda-160RV    | CGTGGAAGACGAAGTCGAACG                | Quantification of <i>fda</i>                | This study |
| tlsA-F          | CCCAAGCTTGAGCAACTGCATCGACACCG        | Complementation of <i>tlsA</i>              | This study |
| tlsA-Rv         | CCCAAGCTTGGGTTCCCGGTAGATCGAACG       | Complementation of <i>tlsA</i>              | This study |
| alkB-F          | CGGGATCCGGTCAACGACGCGATATCTTAC       | Complementation of <i>alkB</i>              | This study |
| alkB-Rv         | CCCAAGCTTGCAGGTTTTCGACACAGCC         | Complementation of <i>alkB</i>              | This study |
| fda-F           | CGGGATCCGATGTTGCCGAGGAAGTAGC         | Complementation of <i>fda</i>               | This study |
| fda-Rv          | CCCAAGCTTGTCTGAAACCGGTGTCAGCTCGC     | Complementation of <i>fda</i>               | This study |
| D191-A_FM       | GTGTGCGCGTGAGCGATCGCATGGAAGAG        | Point mutation of D191A                     | This study |
| D191-A_RM       | CTCTTCCATGCGATCGCTCACGCGCACAC        | Point mutation of D191A                     | This study |
| H192-A_FM       | GTCGGTGTGCGCGGCATCGATCGC             | Point mutation of H192A                     | This study |
| H192-A_RM       | GCGATCGATGCCGCGCACACCGAC             | Point mutation of H192A                     | This study |
| D196-A_FM       | CGACTGCATGGCGGTGTGCGCG               | Point mutation of D196A                     | This study |
| D196-A_RM       | CGCGCACACCGCCATGCAGTCG               | Point mutation of D196A                     | This study |
| exp-fda-F       | GGAATTCATATGCCAATTGCGACTCCCAGGTCTACG | Expression of <i>Fda</i> and <i>Fda-His</i> | This study |
| exp-fda-Rv      | CGCAAGCTTGCTCGCGGACACCGAGCGTCC       | Expression of <i>Fda</i>                    | This study |
| exp-fda-Rv-His  | CGCAAGCTTTCAGCTCGCGGACACCGAGCGTCC    | Expression of <i>Fda-His</i>                | This study |
| pro-alkB-rubB-F | GCCTCTAGACACCTGCTCGACGGACAGG         | Construction of overexpression plasmid      | This study |
| pro-alkB-RV     | GGCAAGCTTCTCCAGTGTCTCGTGACGC         | Construction of overexpression plasmid      | This study |
| x-tlsA-F        | CCGAAGCTTCTCACTAGTTCAGGAGCC          | Overexpression of <i>tlsA</i>               | This study |
| x-tlsA1-RV      | CCGAAGCTTGTGTCATCCCGCCGATCCG         | Overexpression of <i>tlsA</i>               | This study |
| x-fda-F         | CCGAAGCTTCTGCTGGTGATCACAGCGC         | Overexpression of <i>fda</i>                | This study |
| x-fda-RV        | CCGAAGCTTCTGAAACCGGTGTCAGCTCG        | Overexpression of <i>fda</i>                | This study |

Supplemental table 1. Inaba *et al.*

References of supplemental materials

1. **Miranda-CasoLuengo, R., P. S. Duffy, E. P. O'Connell, B. J. Graham, M. W.**

**Mangan, J. F. Prescott, and W. G. Meijer.** 2005. The iron-regulated *iupABC*

operon is required for saprophytic growth of the intracellular pathogen

*Rhodococcus equi* at low iron concentrations. J. Bacteriol. **187**:3438-3444.
